# Supplementary material for: Carbonate biomineralization differentially induced by two psychrophilic Pseudomonas psychrophila strains isolated from an alpine travertine landform
Source: Royal Society of Chemistry journal article supplement (doi:10.1039/d1ra00578b), 2021-01-01
Supplement: d1ra00578b1.pdf [file d1ra00578b1.pdf]

### Colony morphology and phylogenetic analysis of *Pseudomonas psychrophila* strain A20-18 and B21-3

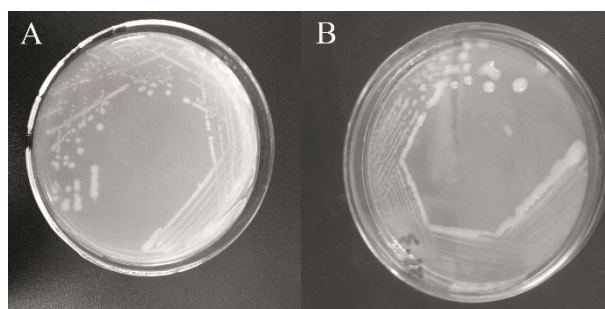

Figure S1 Colony morphology of strain A20-18 (A) and B21-3(B)

In the stable phase, strain A20-18 and strain B21-3 formed round colonies with diameters of 3-4 mm and 3-5 mm respectively. The colonies were milky white with neat and moist edges.

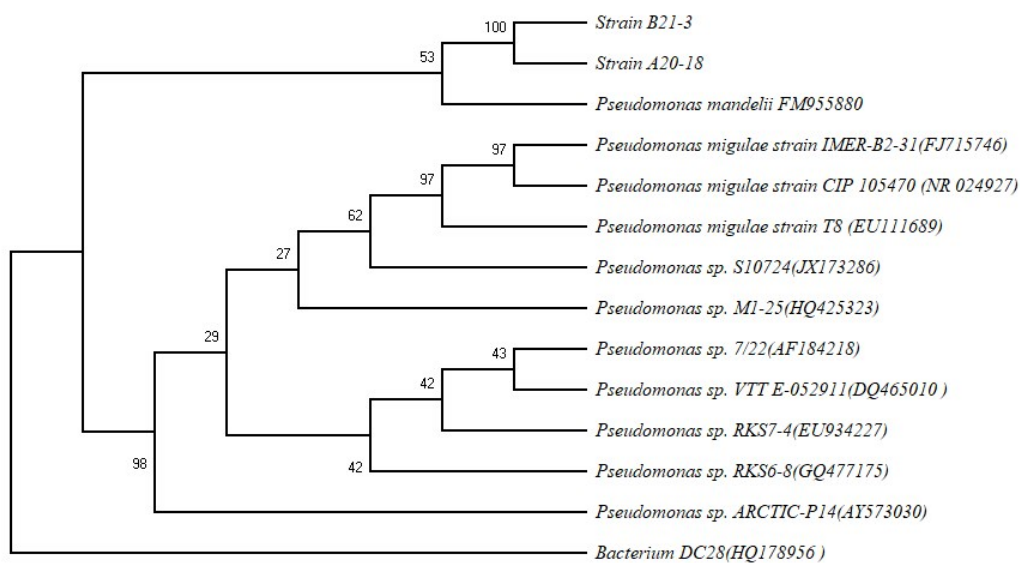

Figure S2 Phylogenetic tree of two *Pseudomonas psychrophila* strains

Strain A20-18 and strain B21-3 have high homology and both belong to the genus *Pseudomonas*
